# Supplementary material for: A new class of capsid-targeting inhibitors that specifically block HIV-1 nuclear import
Source: PubMed Central journal article supplement (PMC11555092; doi:10.1038/s44321-024-00143-w), 2024-10-02
Supplement: 44321_2024_143_MOESM6_ESM.pdf [file 44321_2024_143_MOESM6_ESM.pdf]

## Appendix

|                          |    |
|--------------------------|----|
| Appendix Figure S1.....  | 2  |
| Appendix Figure S2.....  | 4  |
| Appendix Figure S3.....  | 5  |
| Appendix Figure S4.....  | 7  |
| Appendix Figure S5.....  | 8  |
| Appendix Figure S6.....  | 10 |
| Appendix Figure S7.....  | 11 |
| Appendix Figure S8.....  | 14 |
| Appendix Figure S9.....  | 15 |
| Appendix Figure S10..... | 16 |
| Appendix Figure S11..... | 17 |
| Appendix Table S1.....   | 19 |
| - Fig. 2G.....           | 19 |
| - Fig. 5D.....           | 20 |
| - Fig. 6A.....           | 21 |
| - Fig. 6B.....           | 23 |
| - Fig. EV2.....          | 25 |

**Appendix Figure S1:** Chemical structures of the initial compounds assayed in Fig. 1A (compounds 1-40).

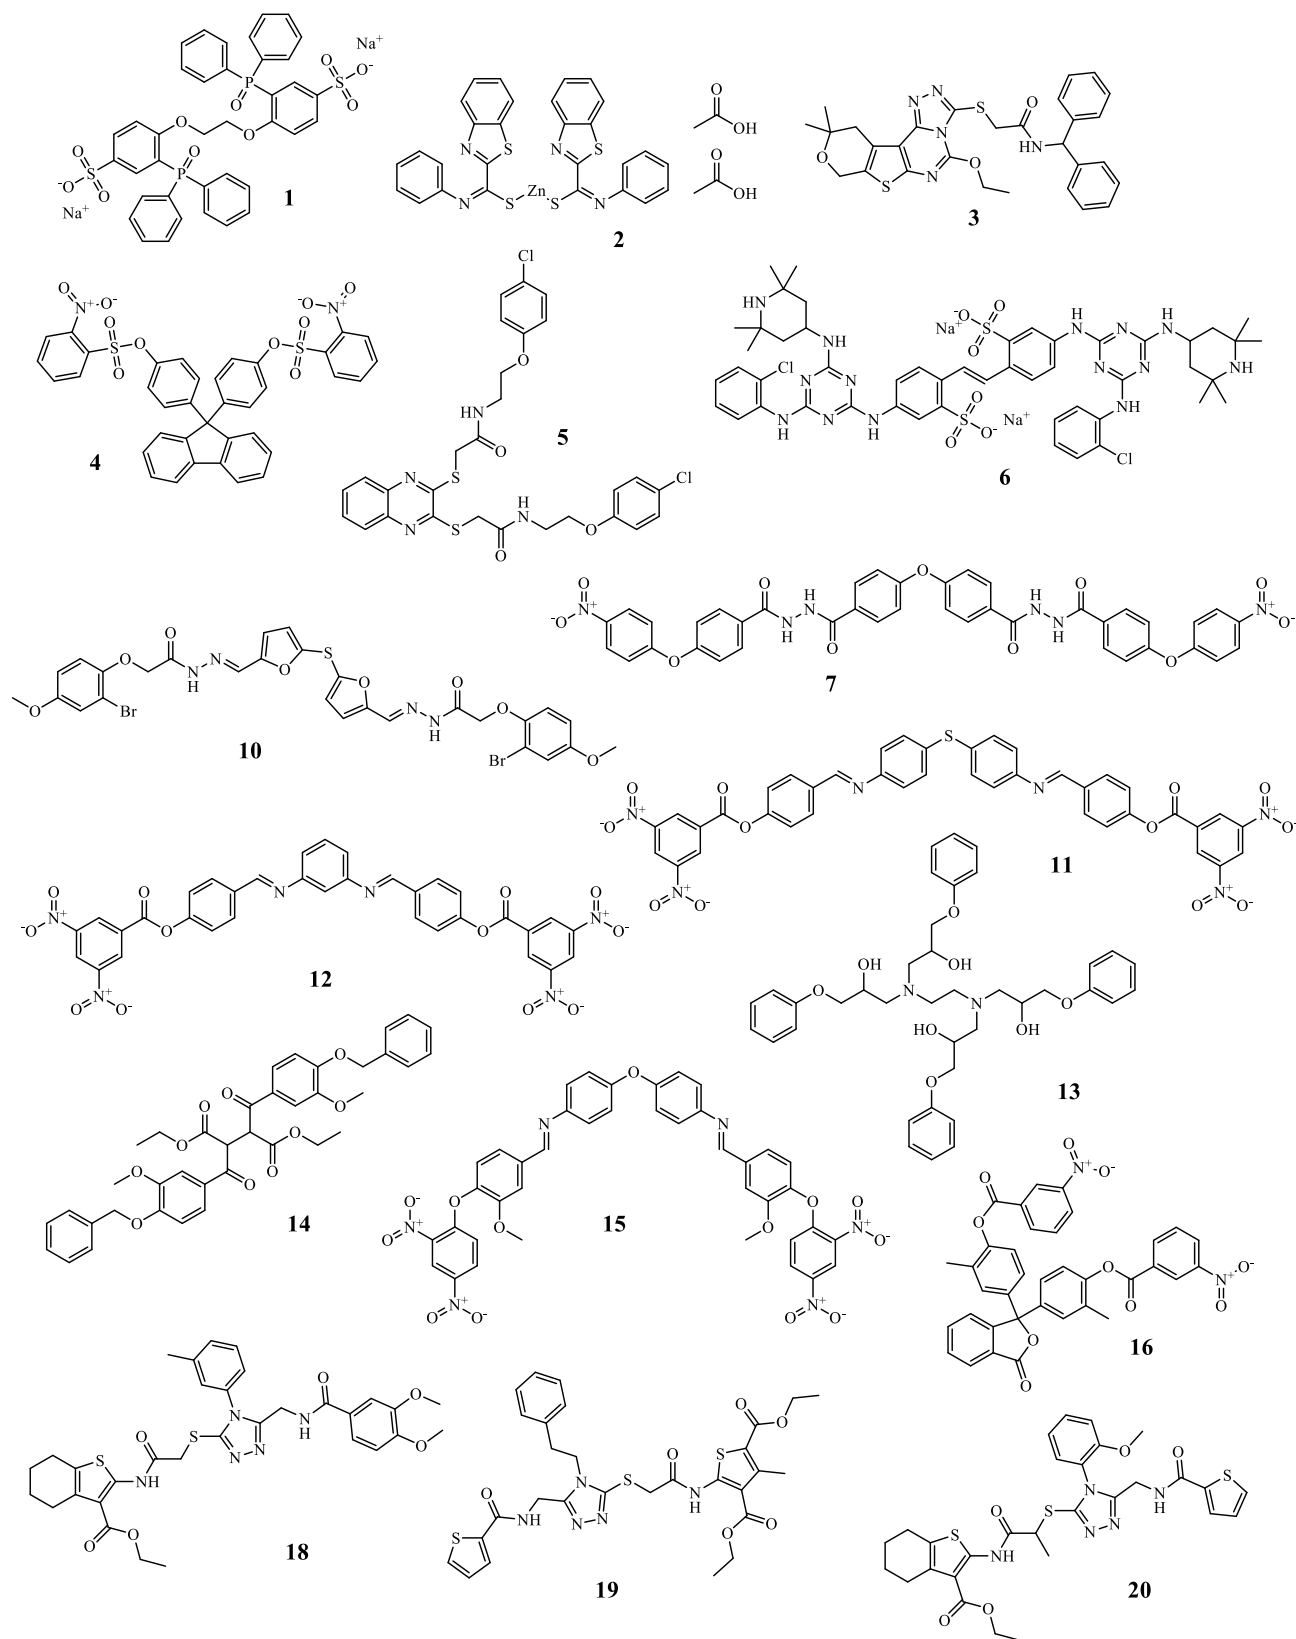

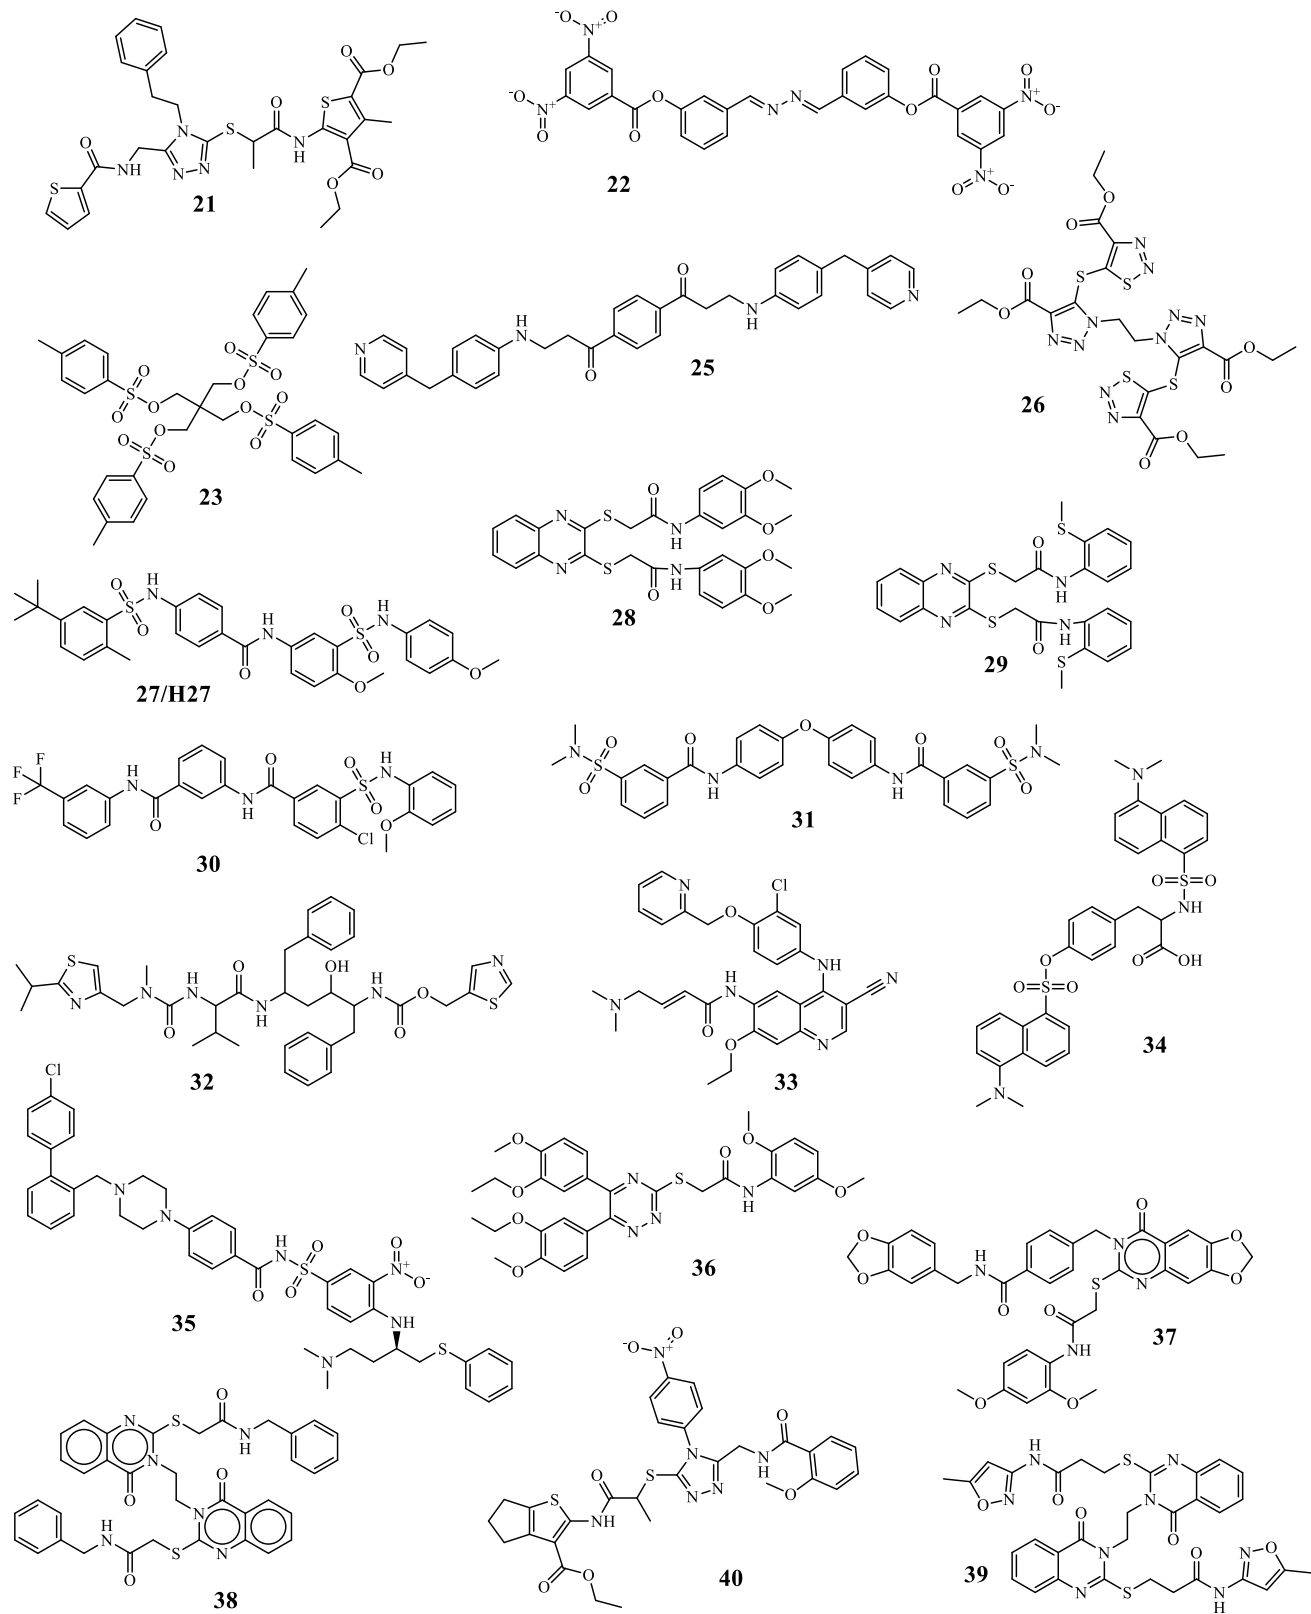

**Appendix Figure S2: Binding affinity of H27 to HIV-1 hexamers. (A)** SPR analysis of H27 (500  $\mu\text{M}$ ) binding to HIV-1 CA monomers (48,00RU), hexamers (14,000 RU, and to TRN-1 (14,000 RU) immobilized on a CM-5 sensor chip. **(B)** Determination of  $K_D$  of H27 for immobilized HIV-1 CA hexamers by one cycle kinetic titration at five increasing H27 concentrations (62, 125, 250, 500 and 1,000  $\mu\text{M}$ ).

**A**

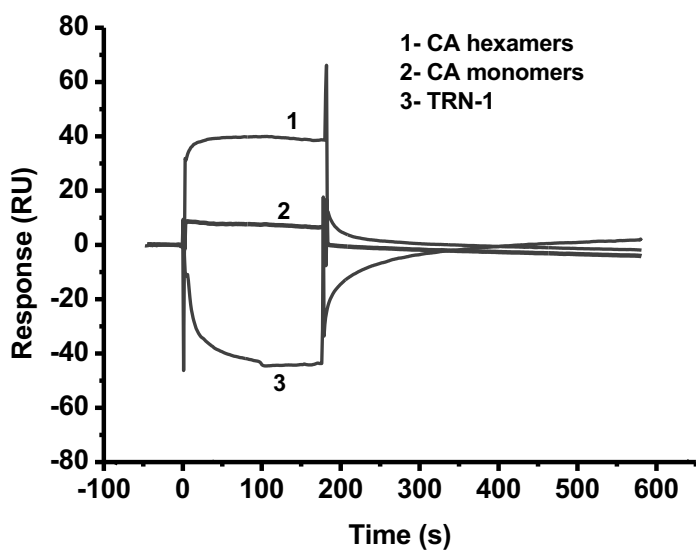

**B**

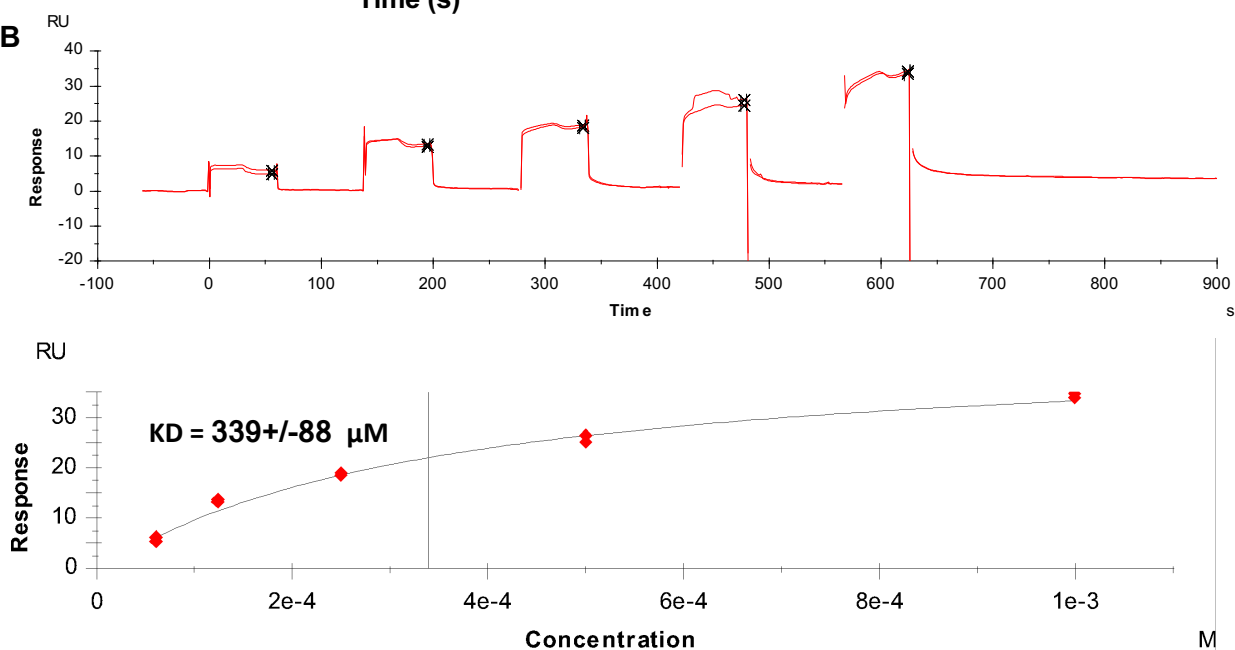

**Appendix Figure S3: Effect of H27 on infection, cell viability and HIV-1 reverse transcription.** **(A)** All tested HIV-1 were equally sensitive to H27, regardless of the tropism of their envelope. Infectivity in HeLa-R5 cells was assessed by  $\beta$ -gal chemiluminescent assay at 48 hpi. Results show mean triplicate values  $\pm$  SD from 2 independent experiments. For toxicity kinetics in **(B)** HeLa-R5 cells and **(C)** peripheral blood lymphocytes (PBL), cells were treated with H27 and compound **31** at concentrations ranging between 0.01 and 100  $\mu$ M for 1, 3 or 6 days. Toxicity was assessed by Cell Titer assay. Results are representative of 2 independent experiments. Puromycin (2  $\mu$ g/mL) was added to PBL as positive control. **(D)** Effect of H27 on reverse transcription at 7 hpi. HeLa-R5 cells were pre-treated with compounds at the indicated concentrations, then infected with VSV-G pseudotyped LAI, X4 tropic NL4-3 or R5-tropic BaL virus, at 1 ng p24/1,000 cells for 7 h. Compounds **31** and **40** were included as negative controls since they do not affect HIV-1 infection. Results are the mean of 2 independent experiments  $\pm$  SEM normalised for the corresponding DMSO control. The reverse transcriptase inhibitor NVP (5  $\mu$ M) were included as a negative control in all experiments. Reverse transcription (RT<sup>o</sup>) efficiency was assessed by qPCR amplification of late reverse transcripts (LRT) and normalised for Actin values.

**A**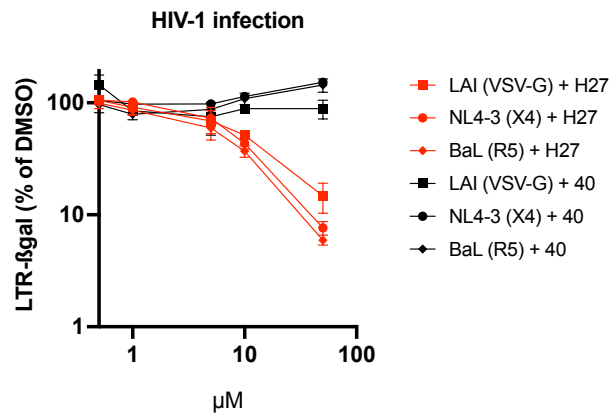**B**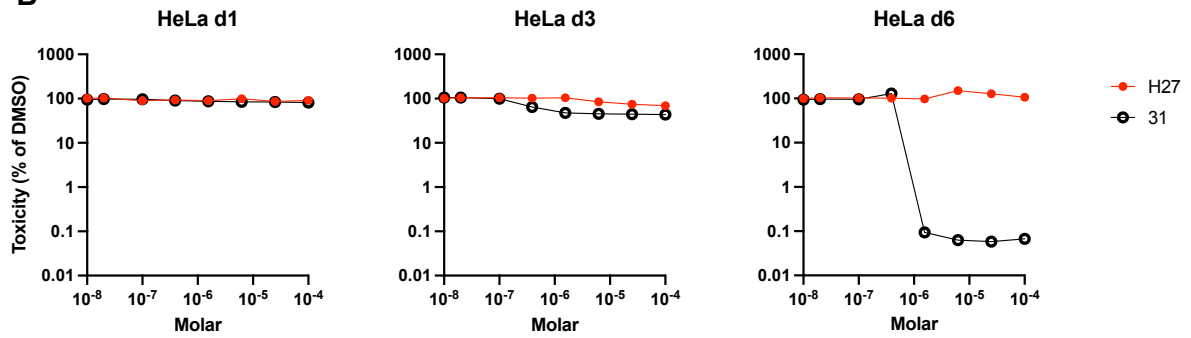**C**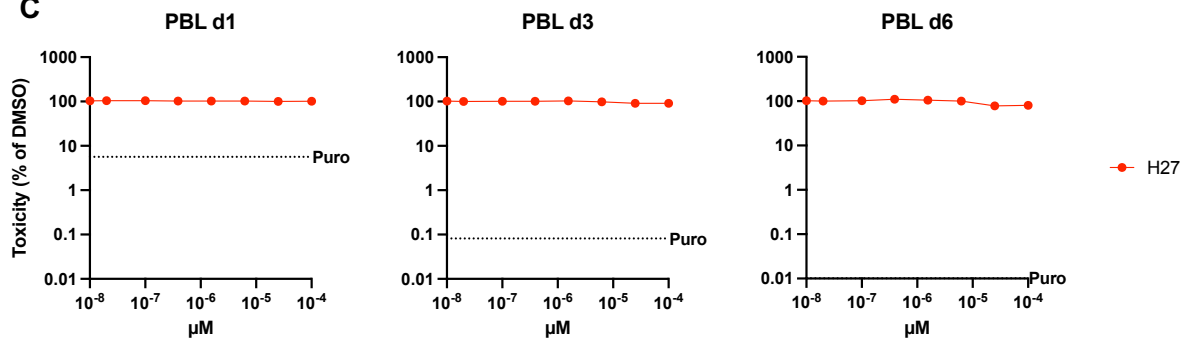**D**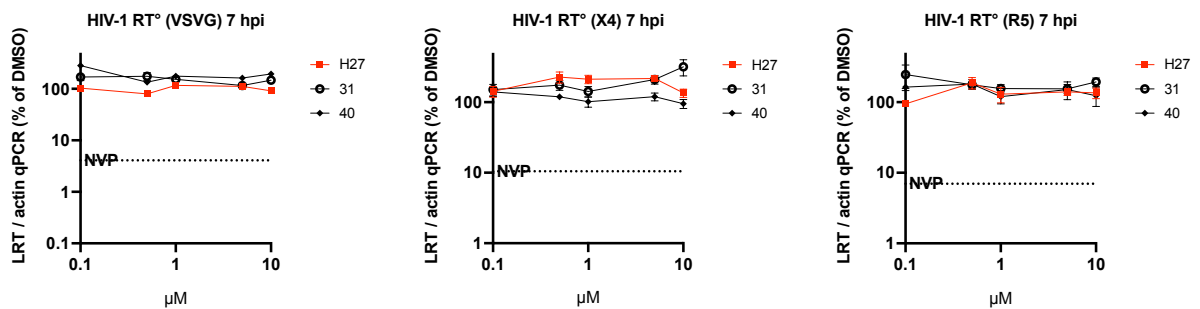

**Appendix Figure S4: SPR measurement of AG3.0 antibody kinetics against monomeric and hexameric capsids.** The affinity of AG3.0 antibody against monomeric and hexameric capsids were performed using one cycle kinetic titration by capture of AG3.0 (220 RU) on immobilized mouse anti-Fc and injecting monomeric CA from 10 to 160 nM and hexameric CA from 100 to 1600 nM, as two-fold dilution series. The  $K_D$  were calculated using a bivalent fitting model.

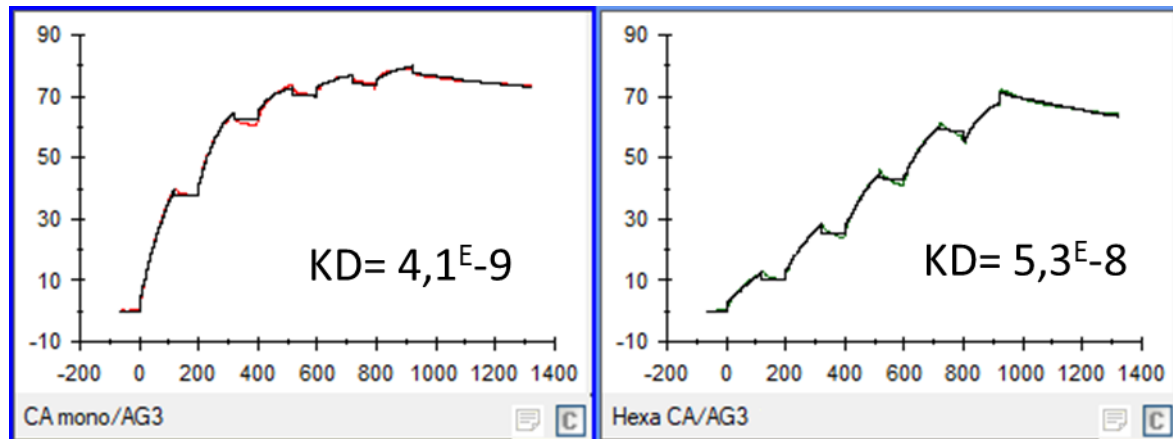

| Sample  | $k_a$ (1/Ms) | $k_d$ (1/s) | <b>KD(M)</b>    | Chi <sup>2</sup> (RU <sup>2</sup> ) |
|---------|--------------|-------------|-----------------|-------------------------------------|
| CA mono | 1,69E+05     | 6,96E-04    | <b>4,12E-09</b> | 0,426                               |
| Hexa CA | 5,93E+03     | 3,20E-04    | <b>5,39E-08</b> | 0,478                               |

**Appendix Figure S5: CA localisation following treatment with H27, PF74 or LEN.** HeLa-R5 were treated with H27 (3  $\mu$ M), PF74 (1  $\mu$ M), LEN (9 nM), or DMSO (0.5%), then inoculated with LAI-VSV-G at 1 ng p24/1,000 cells in serum-free medium to promote cell attachment, then incubated in 10% FCS for a further 2 h or 6 h to allow infection to proceed. Samples were fixed, permeabilised and labelled with anti-CA and -Nup214 antibodies, and stained with Hoechst. Images were acquired on a LSM880 Airyscan confocal microscope with a 63  $\times$  objective. The cell periphery was delineated using the line tool from Fiji using cell autofluorescence. Arrows point to intranuclear CA spots. Images are representative of 3 independent experiments.



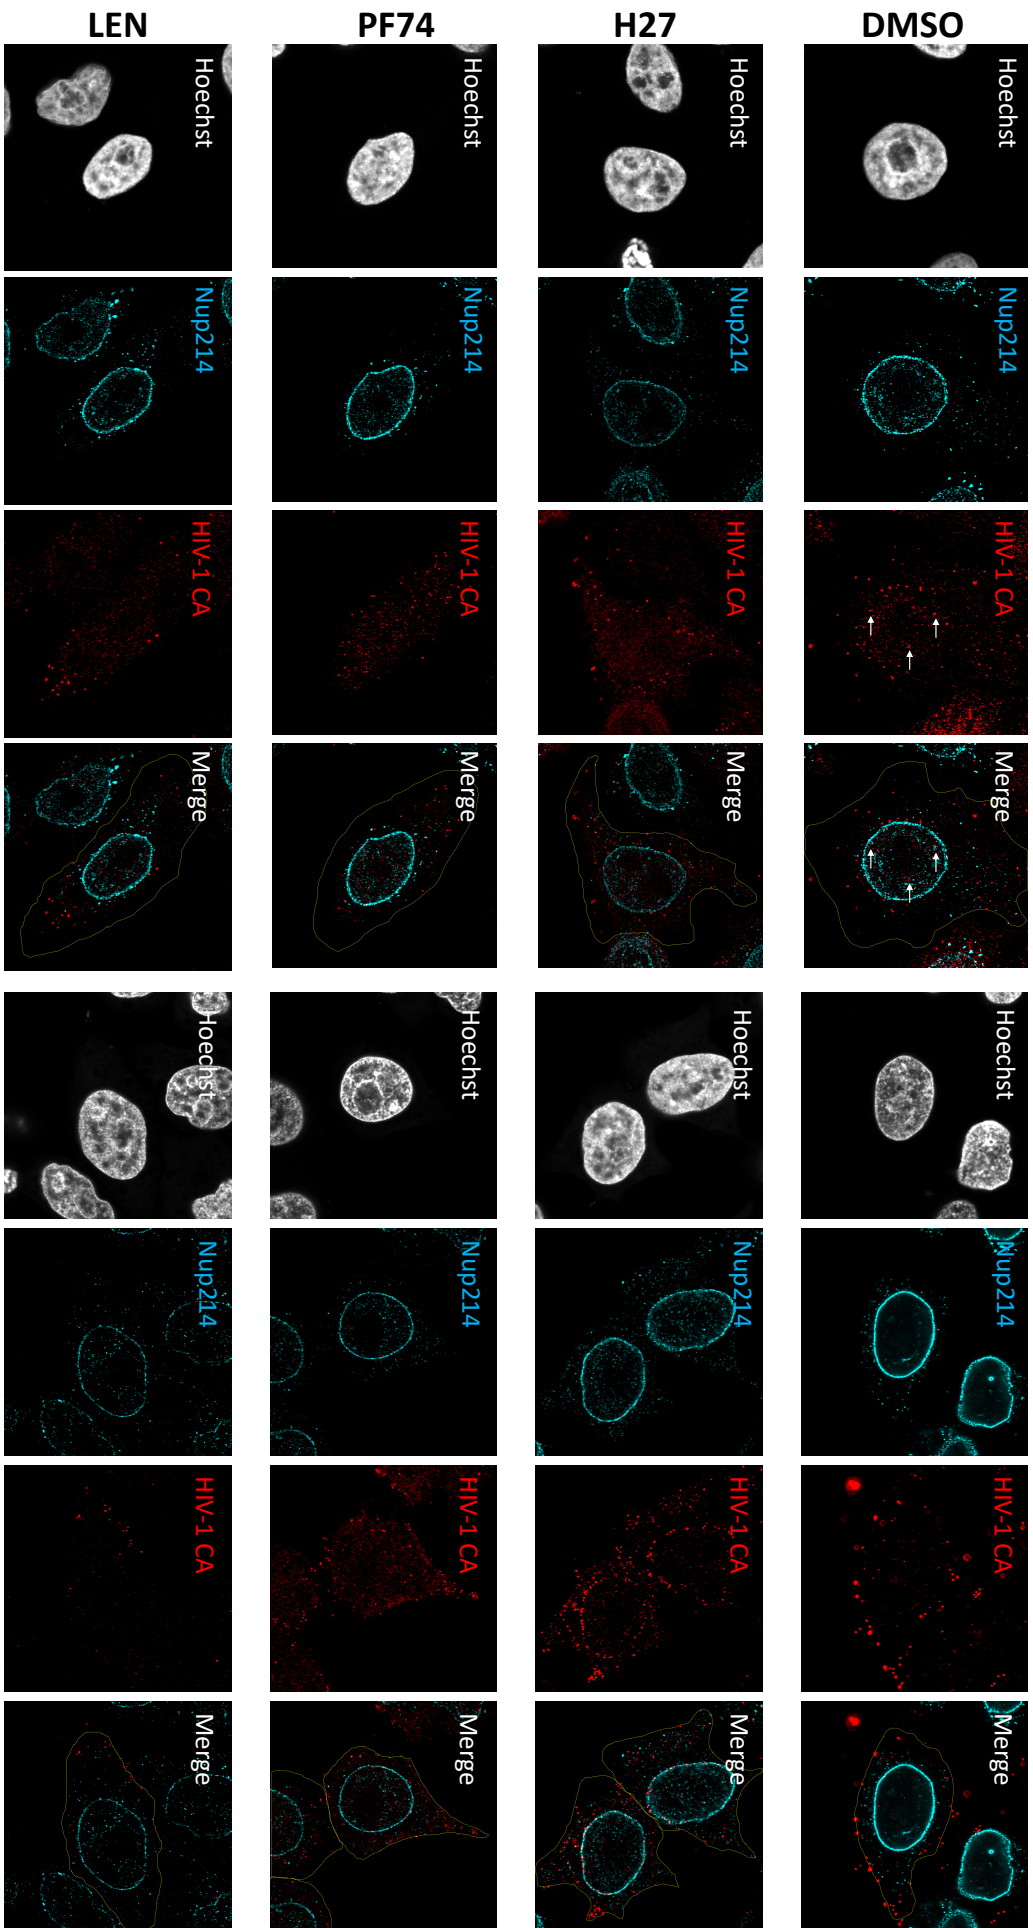

Early (2 hpi)

Late (6 hpi)

**Appendix Figure S6: Effect of H27 on the subcellular localization of shuttling proteins.**

**(A)** HeLa-R5 cells were treated with DMSO or H27 (10  $\mu$ M) for 8 h, then fixed and labelled with antibodies recognizing the shuttling proteins TRN-1, CPSF6 and PML. **(B)** HeLa-R5 cells were pre-treated with DMSO or H27 (10  $\mu$ M) for 2 h, then stimulated with Influenza A virus (WSN strain) at 0.1 TCID<sub>50</sub>/cell. Cells were fixed after 6 h and labelled with antibodies recognizing the innate immune transcription factors IRF-3 and NF- $\kappa$ B or the viral nucleoprotein (NP). Scale bars = 10  $\mu$ m.

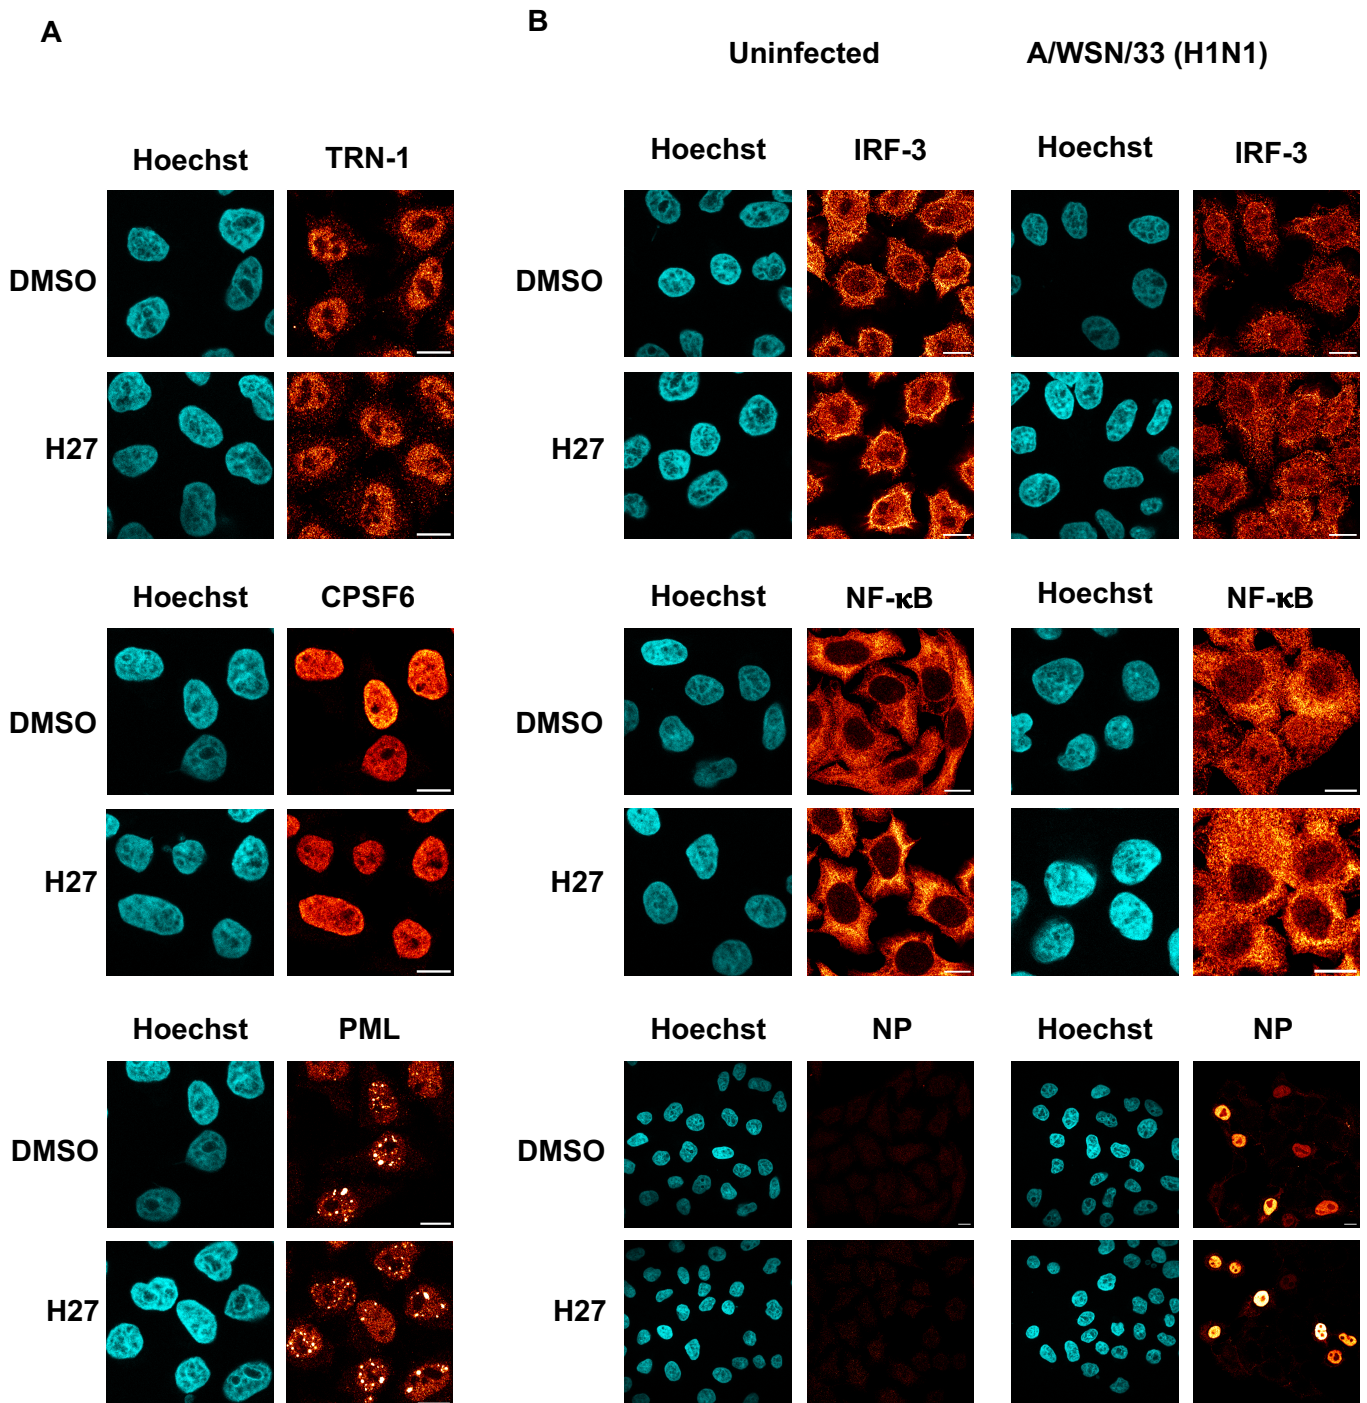

**Appendix Figure S7: Infectivity and toxicity of H27 and analogues 41 - 85.** The infectivity and toxicity of H27 and its structural analogues (compounds **41** to **85**) were assessed in HeLa-R5 cells. Infectivity was determined at 48 hpi following infection with HIV-1-VSV-G at 0.1 ng p24/1,000 cells, and toxicity was assessed in separate plates by Cell Titer assay in HeLa-R5 cells. Results show the mean  $\pm$  SD of 2 independent experiments performed in triplicate.

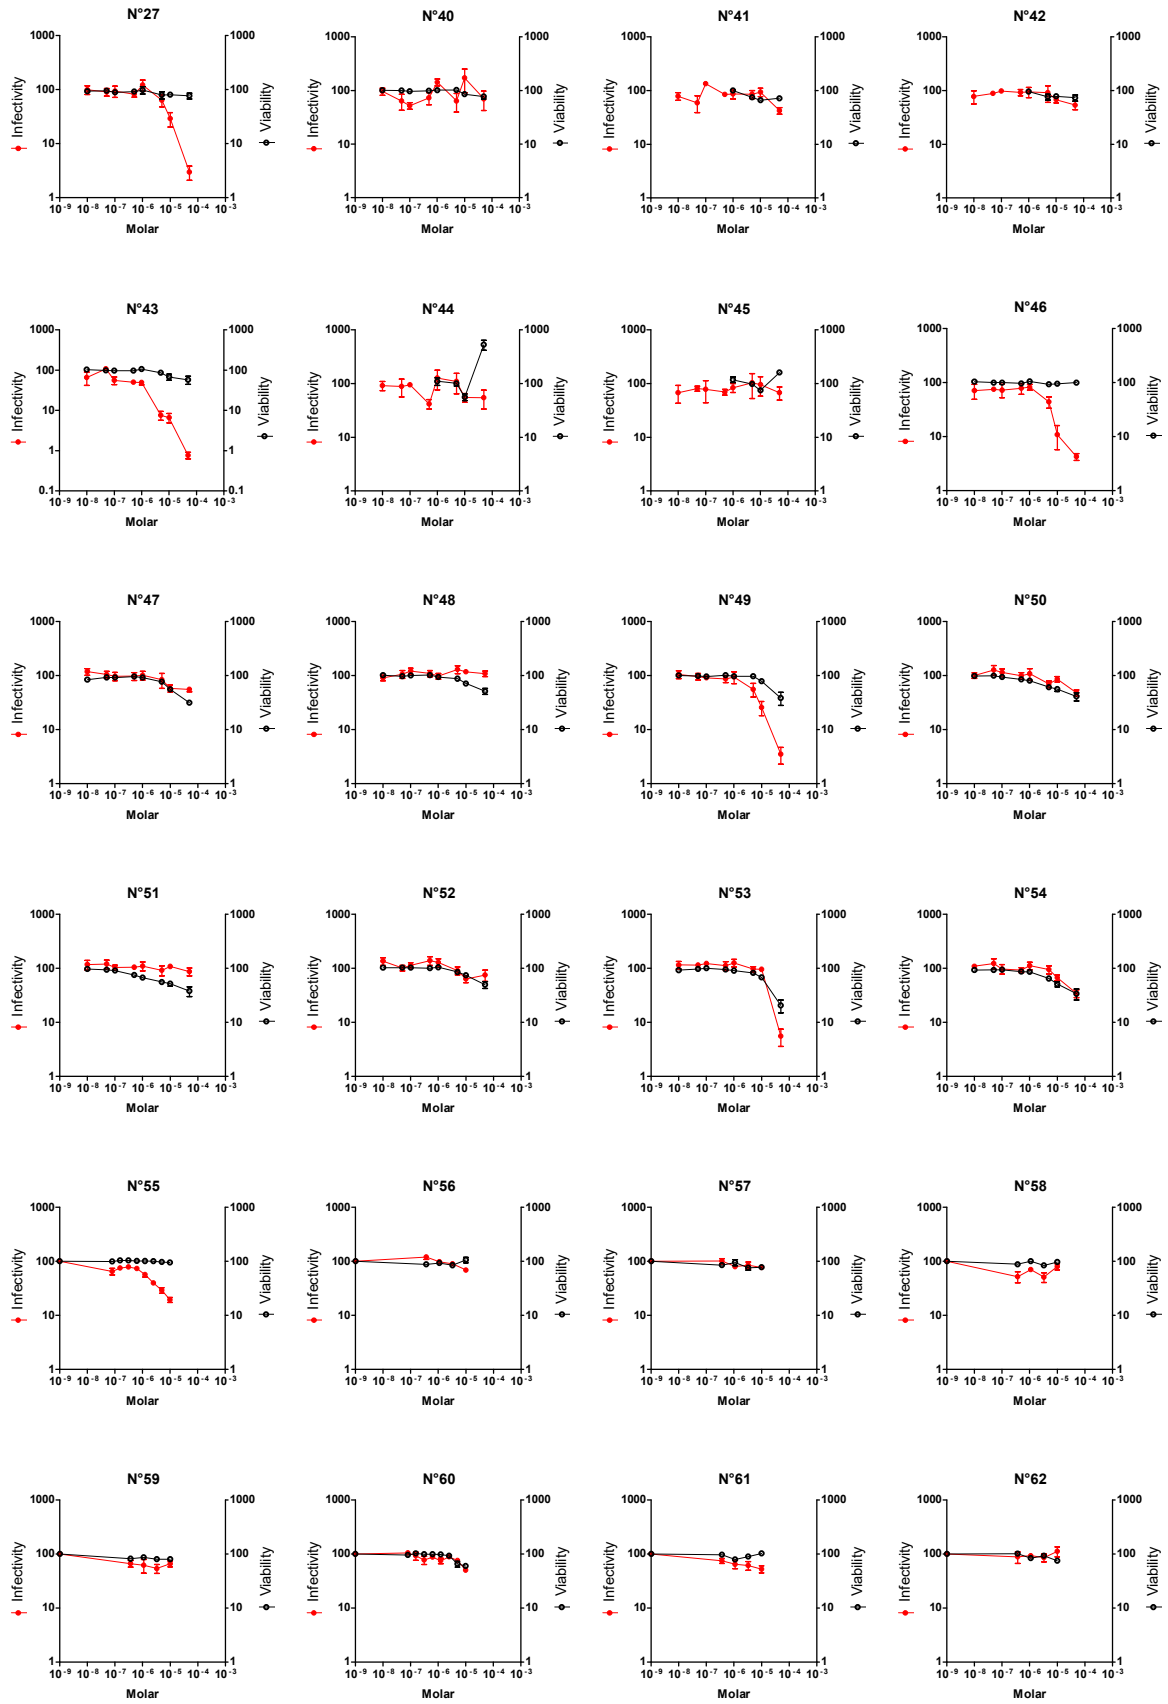

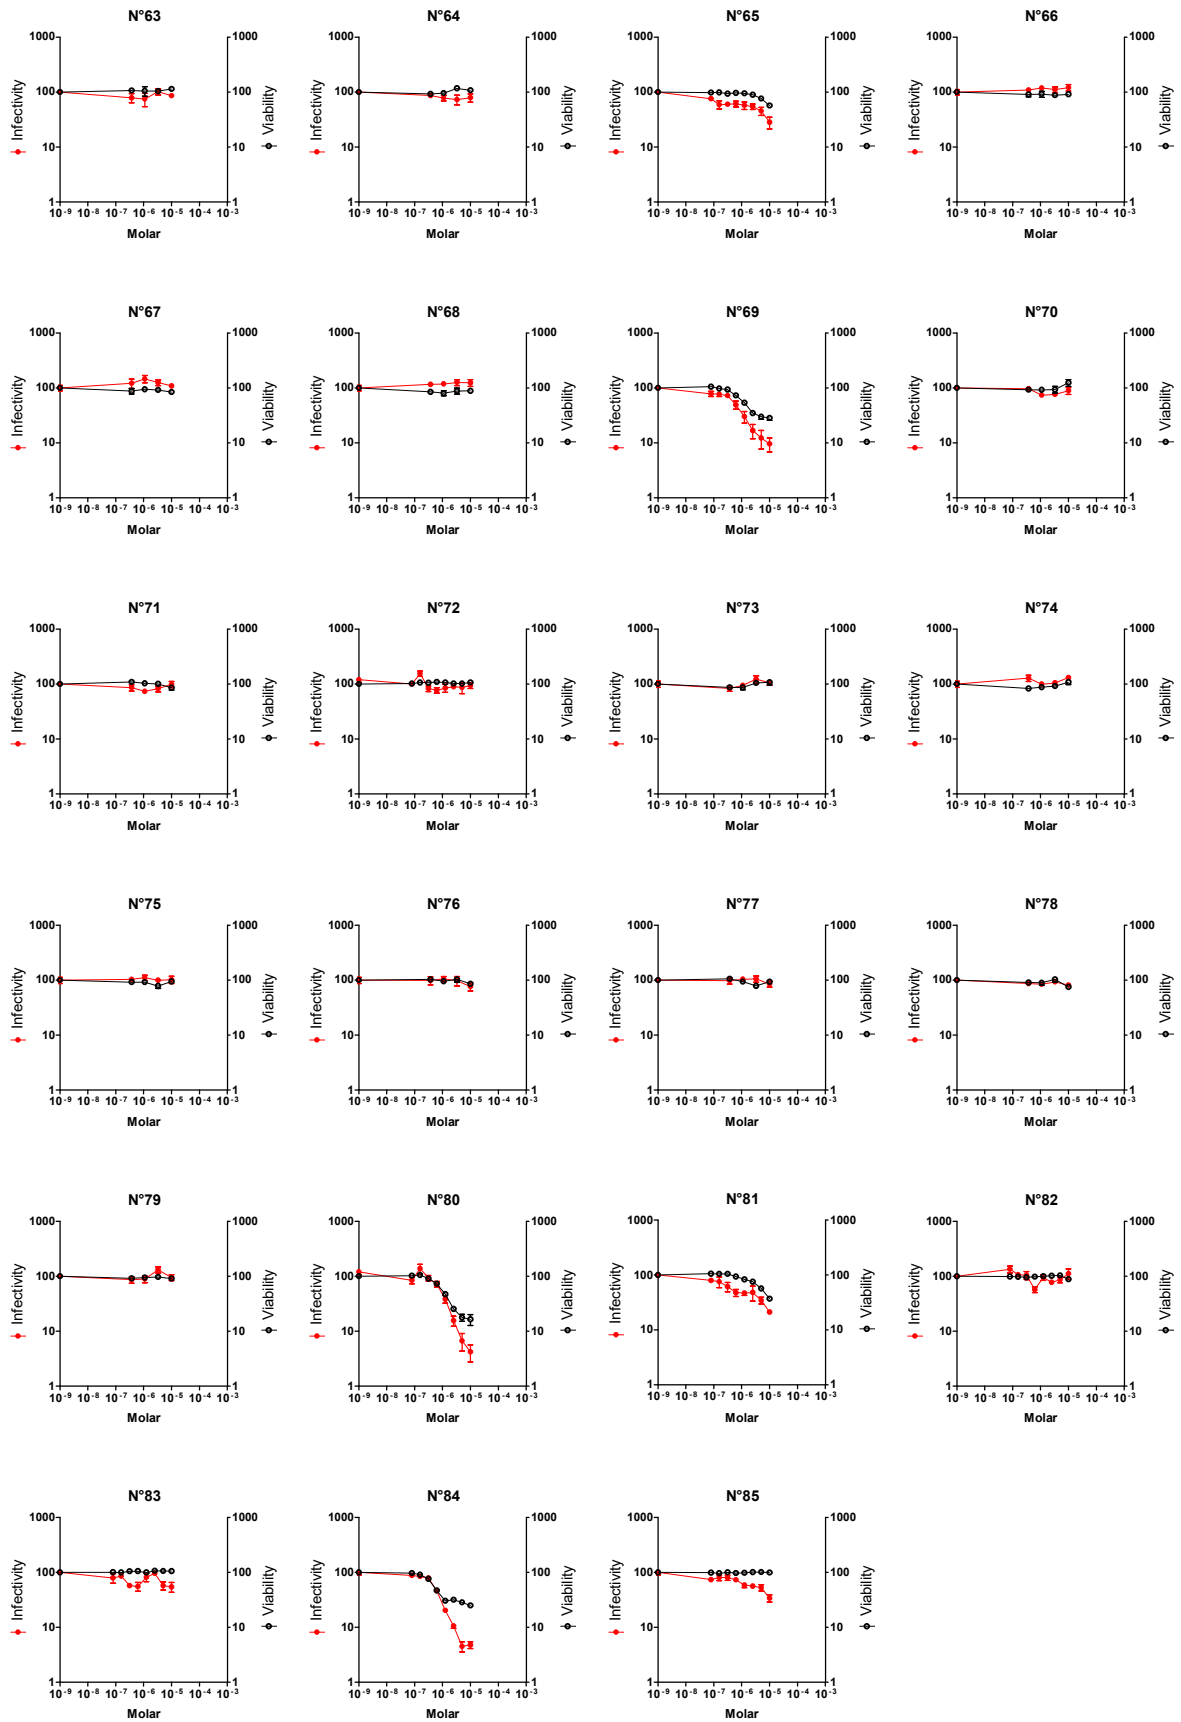



**Appendix Figure S9: Listing of CA residues from two adjacent monomers within a hexamer that contact H27.** Residues either from **(A)** HIV-1 or from **(B)** SIVmac in contact with H27 (ranked by contact frequency during MD simulations showing only high frequency contact (> 10%)). Sustained binding observed with residues belonging to the PR loop are highlighted in yellow and common residues between HIV-1 and SIVmac CA are underlined in grey. **(C)** PY-NLS that is recognized by TRN-1, and corresponding residues for SIVmac251. Residues implicated in sustained contact with H27 are highlighted in yellow.

**A**

| Ligand | ResName    | Monomer  | ResNumber | Contact (%) |
|--------|------------|----------|-----------|-------------|
| H27    | PRO        | A        | 125       | 59.3        |
| H27    | PRO        | A        | 122       | 57.3        |
| H27    | <b>MET</b> | <b>A</b> | <b>96</b> | <b>52</b>   |
| H27    | PRO        | A        | 123       | 51.1        |
| H27    | GLN        | B        | 112       | 46.4        |
| H27    | GLN        | A        | 4         | 45.8        |
| H27    | THR        | B        | 110       | 44.6        |
| H27    | ILE        | B        | 115       | 44.3        |
| H27    | ILE        | A        | 124       | 41.9        |
| H27    | GLY        | B        | 116       | 40.6        |
| H27    | ILE        | A        | 129       | 39.7        |
| H27    | TRP        | A        | 80        | 39.4        |
| H27    | <b>PRO</b> | <b>B</b> | <b>93</b> | <b>37.3</b> |
| H27    | ARG        | A        | 132       | 36.1        |
| H27    | THR        | B        | 119       | 36          |
| H27    | <b>GLY</b> | <b>B</b> | <b>94</b> | <b>35.9</b> |
| H27    | <b>GLN</b> | <b>B</b> | <b>95</b> | <b>34.8</b> |
| H27    | LEU        | A        | 6         | 34.1        |
| H27    | HIS        | B        | 12        | 33.2        |
| H27    | GLU        | B        | 113       | 31.7        |
| H27    | <b>HIS</b> | <b>A</b> | <b>84</b> | <b>30.4</b> |
| H27    | VAL        | B        | 11        | 30.1        |
| H27    | MET        | A        | 10        | 29.6        |
| H27    | HIS        | A        | 120       | 29.1        |
| H27    | <b>PRO</b> | <b>A</b> | <b>99</b> | <b>28.5</b> |
| H27    | ASN        | A        | 5         | 28          |
| H27    | HIS        | B        | 120       | 27.9        |
| H27    | MET        | B        | 10        | 25.2        |
| H27    | LEU        | A        | 83        | 24.7        |
| H27    | TRP        | B        | 117       | 24.2        |
| H27    | <b>ALA</b> | <b>B</b> | <b>92</b> | <b>23.3</b> |
| H27    | GLN        | B        | 9         | 20.8        |
| H27    | <b>GLU</b> | <b>A</b> | <b>98</b> | <b>20.5</b> |
| H27    | GLU        | A        | 128       | 19.6        |
| H27    | MET        | A        | 118       | 18.7        |
| H27    | GLU        | A        | 79        | 16.7        |
| H27    | ILE        | B        | 124       | 16.4        |
| H27    | TRP        | A        | 133       | 15.7        |
| H27    | ASN        | A        | 121       | 15.4        |
| H27    | <b>ARG</b> | <b>B</b> | <b>97</b> | <b>13.7</b> |
| H27    | GLN        | A        | 9         | 13          |
| H27    | ILE        | A        | 2         | 10          |

**B**

| Ligand | ResName    | Monomer | ResNumber | Contact (%) |
|--------|------------|---------|-----------|-------------|
| H27    | <b>VAL</b> | B       | 10        | 96.4        |
| H27    | <b>TYR</b> | A       | 9         | 92.7        |
| H27    | <b>ASP</b> | B       | 109       | 92.2        |
| H27    | <b>TYR</b> | A       | 116       | 88.7        |
| H27    | <b>GLN</b> | A       | 118       | 88.4        |
| H27    | <b>HIS</b> | B       | 11        | 84.9        |
| H27    | <b>VAL</b> | B       | 108       | 84.7        |
| H27    | <b>PRO</b> | A       | 121       | 81.1        |
| H27    | <b>ILE</b> | B       | 112       | 78.9        |
| H27    | <b>ARG</b> | A       | 117       | 67.6        |
| H27    | <b>ILE</b> | B       | 5         | 62.4        |
| H27    | <b>VAL</b> | A       | 2         | 60.2        |
| H27    | <b>GLN</b> | A       | 113       | 52          |
| H27    | <b>GLN</b> | A       | 4         | 51.3        |
| H27    | <b>ILE</b> | A       | 112       | 51.1        |
| H27    | <b>PRO</b> | A       | 123       | 43.1        |
| H27    | <b>TYR</b> | B       | 9         | 42.4        |
| H27    | <b>GLN</b> | B       | 3         | 35.8        |
| H27    | <b>PRO</b> | B       | 13        | 34.4        |
| H27    | <b>HIS</b> | A       | 11        | 33.6        |
| H27    | <b>GLY</b> | A       | 7         | 31.1        |
| H27    | <b>TYR</b> | B       | 49        | 30.9        |
| H27    | <b>LEU</b> | B       | 12        | 30          |
| H27    | <b>ASN</b> | B       | 8         | 29.3        |
| H27    | <b>VAL</b> | A       | 10        | 28.2        |
| H27    | <b>GLN</b> | B       | 113       | 24.7        |
| H27    | <b>MET</b> | A       | 115       | 23.6        |
| H27    | <b>ASN</b> | A       | 8         | 21.6        |
| H27    | <b>VAL</b> | B       | 2         | 17.8        |
| H27    | <b>GLN</b> | A       | 3         | 14.9        |
| H27    | <b>GLY</b> | B       | 6         | 13.8        |
| H27    | <b>ASN</b> | A       | 120       | 10.7        |
| H27    | <b>ASN</b> | A       | 126       | 10.2        |

**C**

84-**HPVHAGPIAPGQMREPR**-100 HIV-1  
84 85 86 87 88 89 90 91 92 93 94 95 96 97 98 99 100

83-HPQPA-PQ-QGQLREPS-97 SIVmac  
83 84 85 86 87 88 89 90 91 92 93 94 95 96 97

**Appendix Figure S10: Titration on HeLa-R5 cells of PBMC supernatants infected with patient plasma.** Infectivity was assessed on HeLa-R5 cells at 48 hpi using undiluted supernatants isolated at the indicated days after PBMC inoculation.  $\beta$ -galactosidase activity is provided as relative light units (RLU) per s. Infectious virus was successfully isolated from the plasma of 7 out of 15 patients. The first supernatant samples yielding an infectivity that was above 1000 RLU/s were selected for experiments shown in **Fig. 6A** to avoid the selection of mutations at later time points. The HIV-1 subtypes were **(A)** Subtype A, **(B)** Subtype B, **(C)** Subtype C, **(D)** Subtype D, **(E)** Subtype F, **(F)** Subtype G, **(G)** Circulating Recombinant Form CRF01\_AE and **(H)** CRF02\_AG.

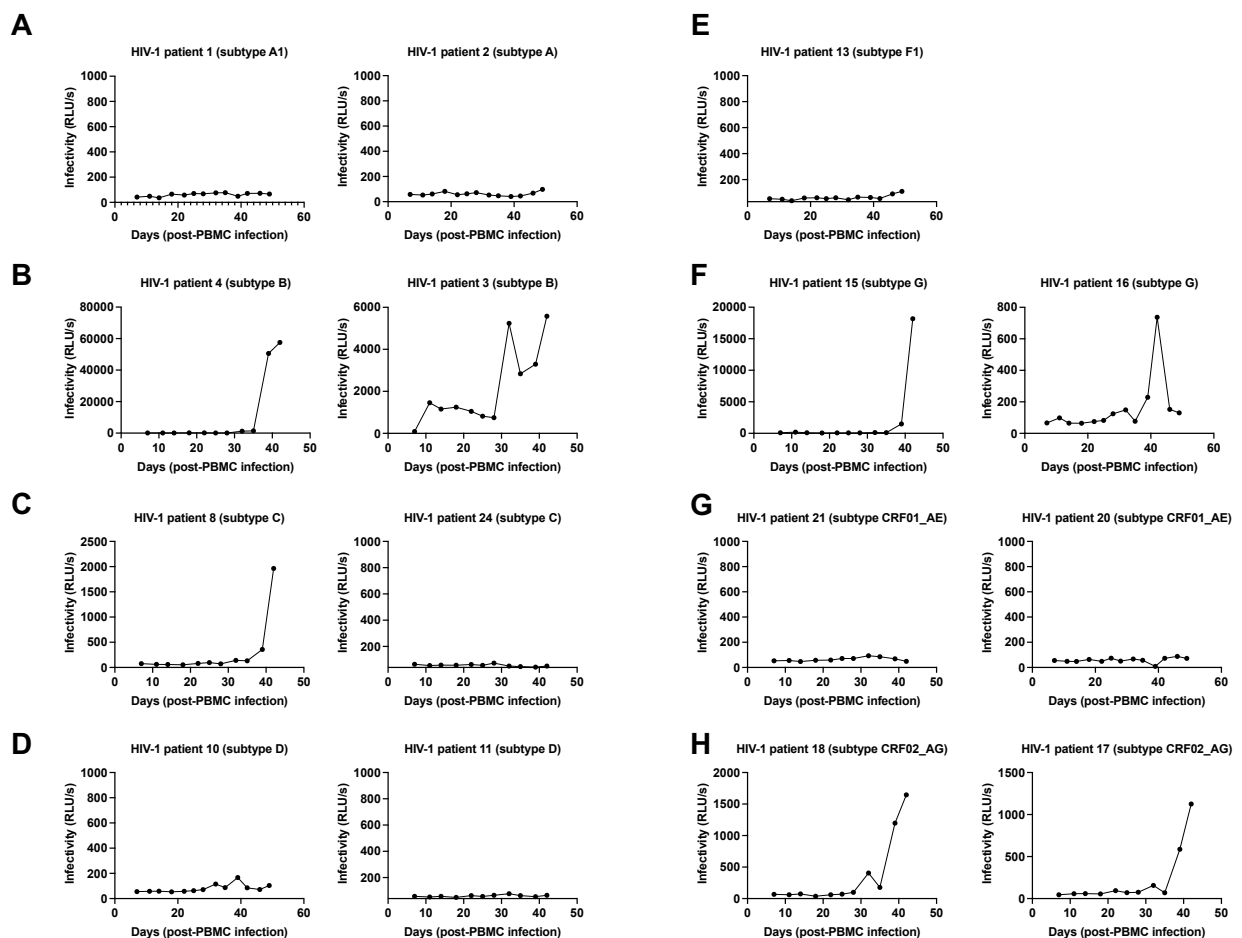



**Appendix Figure S11: *In vivo* evaluation of H27 pharmacokinetics and toxicity. (A, B)** Pharmacokinetic evaluation of H27 in whole blood after single administration. Male C57BL/6 mice were injected **(A)** intravenously (i.v.) or **(B)** intraperitoneally (i.p.) with H27 at 1 or 3 mg/kg, respectively, with 3 mice per group. Serial blood sampling in the tail was performed at 5, 15, 30 min, then 1, 2, 4, 8 and 12 hours for each mouse following i.v. injection or 15, 30 min, then 1, 2, 4, 8 h following i.p. injection. The  $t_{1/2}$  of H27 was 1.6 h after i.v. injection and 5.3 h by i.p. route. Results show the mean values from  $n = 3$  animals at each time point  $\pm$  SD. **(C, D)** Body weight and clinical scores following administration of H27. Female humanized mice were treated every 3-4 days from D37 to D44 and every 2 days from D48 to D69 with the vehicle (30% Kolliphor/ 70% H<sub>2</sub>O) or with H27 treatment at 3 mg/kg by intraperitoneal injection. **(C)** Body weight change from D7 to D69. Body weight change is calculated in reference to the body weight measured at D0. (Left) Average body weight change expressed as mean + SEM in % from D7 to D69. A two-way repeated measures ANOVA with Geisser-Greenhouse and Sidak's multiple comparisons tests was used. No statistical difference was observed. (Centre) Individual body weight change of the 6 vehicle treated mice from D7 to D69. (Right) Individual body weight change of the 6 H27 treated mice from D7 to D69. **(D)** Clinical Scores from D7 to D69. (Left) Average clinical score is expressed as mean + SEM from D0 to D69. A two-way repeated measures ANOVA with Geisser- Greenhouse and Sidak's multiple comparisons tests was used. \*\*  $p = 0.0088$ . (Centre) Individual clinical score of the 6 vehicle treated mice from D0 to D69. (Right) Individual clinical score of the 6 H27 treated mice from D0 to D69.

**A**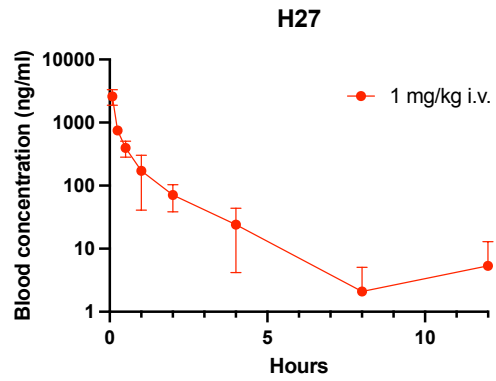**B**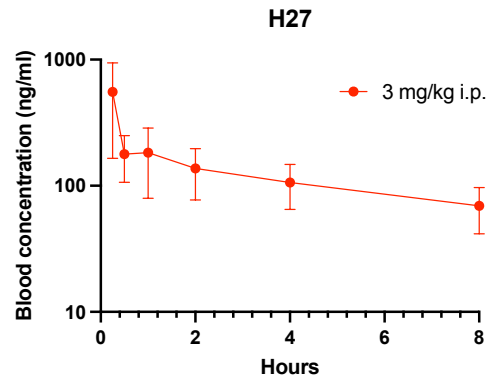**C**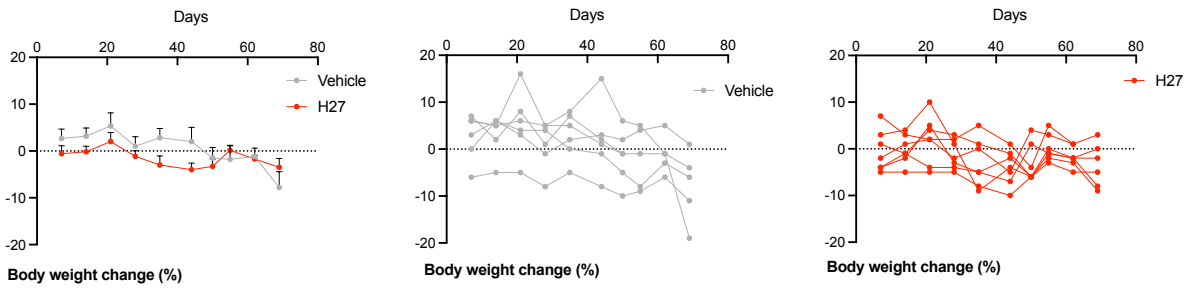**D**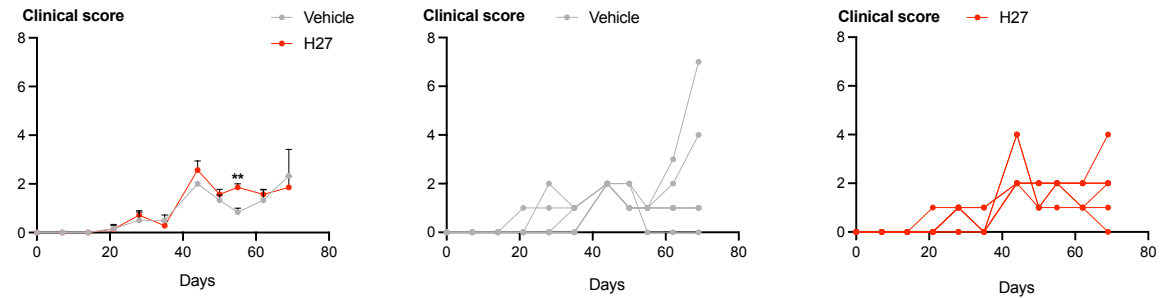

**Appendix Table S1: Exact p values for all figures.**

| <b>Fig. 2G</b>                |                      |                |
|-------------------------------|----------------------|----------------|
| <b>Ordinary one-way ANOVA</b> | <b>Exact p value</b> | <b>Summary</b> |
| H27                           | 0.3369               | ns             |
| PF74                          | 0.0002               | ***            |
| LEN                           | <0.0001              | ****           |

**Fig. 5D**

| <b>CA::TRN-1</b>           |                         |                |
|----------------------------|-------------------------|----------------|
| <b>Kruskal-Wallis test</b> | <b>Adjusted p value</b> | <b>Summary</b> |
| DMSO vs. ni                | 0.0016                  | **             |
| DMSO vs. H27               | 0.0322                  | *              |
| DMSO vs. PF74              | 0.5406                  | ns             |
| DMSO vs. LEN               | >0.9999                 | ns             |
| <b>CA::CPSF6</b>           |                         |                |
| <b>Kruskal-Wallis test</b> | <b>Adjusted p value</b> | <b>Summary</b> |
| DMSO vs. ni                | 0.0004                  | ***            |
| DMSO vs. H27               | >0.9999                 | ns             |
| DMSO vs. PF74              | >0.9999                 | ns             |
| DMSO vs. LEN               | 0.0155                  | *              |

**Fig. 6A**

| <b>YU2</b>          |                  |         |
|---------------------|------------------|---------|
| RM one-way ANOVA    | Adjusted P value | Summary |
| DMSO vs. 5 $\mu$ M  | <0.0001          | ****    |
| DMSO vs. 10 $\mu$ M | <0.0001          | ****    |
| DMSO vs. 50 $\mu$ M | <0.0001          | ****    |
| DMSO vs. NVP        | <0.0001          | ****    |
| DMSO vs. 3TC        | <0.0001          | ****    |
| <b>Patient 3</b>    |                  |         |
| RM one-way ANOVA    | Adjusted P value | Summary |
| DMSO vs. 5 $\mu$ M  | <0.0001          | ****    |
| DMSO vs. 10 $\mu$ M | <0.0001          | ****    |
| DMSO vs. 50 $\mu$ M | <0.0001          | ****    |
| DMSO vs. NVP        | <0.0001          | ****    |
| DMSO vs. 3TC        | <0.0001          | ****    |
| <b>Patient 4</b>    |                  |         |
| RM one-way ANOVA    | Adjusted P value | Summary |
| DMSO vs. 5 $\mu$ M  | 0.0160           | *       |
| DMSO vs. 10 $\mu$ M | 0.0007           | ***     |
| DMSO vs. 50 $\mu$ M | <0.0001          | ****    |
| DMSO vs. NVP        | <0.0001          | ****    |
| DMSO vs. 3TC        | <0.0001          | ****    |
| <b>Patient 8</b>    |                  |         |
| RM one-way ANOVA    | Adjusted P value | Summary |
| DMSO vs. 5 $\mu$ M  | 0.2085           | ns      |
| DMSO vs. 10 $\mu$ M | 0.0086           | **      |
| DMSO vs. 50 $\mu$ M | <0.0001          | ****    |
| DMSO vs. NVP        | <0.0001          | ****    |
| DMSO vs. 3TC        | <0.0001          | ****    |
| <b>Patient 10</b>   |                  |         |
| RM one-way ANOVA    | Adjusted P value | Summary |
| DMSO vs. 5 $\mu$ M  | 0.0223           | *       |
| DMSO vs. 10 $\mu$ M | <0.0001          | ****    |

|                     |                  |         |
|---------------------|------------------|---------|
| DMSO vs. 50 $\mu$ M | <0.0001          | ****    |
| DMSO vs. NVP        | <0.0001          | ****    |
| DMSO vs. 3TC        | <0.0001          | ****    |
| <b>Patient 15</b>   |                  |         |
| RM one-way ANOVA    | Adjusted P value | Summary |
| DMSO vs. 5 $\mu$ M  | <0.0001          | ****    |
| DMSO vs. 10 $\mu$ M | <0.0001          | ****    |
| DMSO vs. 50 $\mu$ M | <0.0001          | ****    |
| DMSO vs. NVP        | <0.0001          | ****    |
| DMSO vs. 3TC        | <0.0001          | ****    |
| <b>Patient 17</b>   |                  |         |
| RM one-way ANOVA    | Adjusted P value | Summary |
| DMSO vs. 5 $\mu$ M  | 0.0001           | ***     |
| DMSO vs. 10 $\mu$ M | <0.0001          | ****    |
| DMSO vs. 50 $\mu$ M | <0.0001          | ****    |
| DMSO vs. NVP        | <0.0001          | ****    |
| DMSO vs. 3TC        | <0.0001          | ****    |
| <b>Patient 18</b>   |                  |         |
| RM one-way ANOVA    | Adjusted P value | Summary |
| DMSO vs. 5 $\mu$ M  | <0.0001          | ****    |
| DMSO vs. 10 $\mu$ M | <0.0001          | ****    |
| DMSO vs. 50 $\mu$ M | <0.0001          | ****    |
| DMSO vs. NVP        | <0.0001          | ****    |
| DMSO vs. 3TC        | <0.0001          | ****    |

**Fig. 6B**

| <b>NL4-3</b>                   |                  |         |
|--------------------------------|------------------|---------|
| RM one-way ANOVA               | Adjusted P value | Summary |
| DMSO vs. 5 $\mu$ M             | 0.0994           | ns      |
| DMSO vs. 10 $\mu$ M            | <0.0001          | ****    |
| DMSO vs. 50 $\mu$ M            | <0.0001          | ****    |
| DMSO vs. 3TC                   | <0.0001          | ****    |
| DMSO vs. NVP                   | <0.0001          | ****    |
| <b>NL4-3 R263K</b>             |                  |         |
| RM one-way ANOVA               | Adjusted P value | Summary |
| DMSO vs. 5 $\mu$ M             | 0.0095           | **      |
| DMSO vs. 10 $\mu$ M            | 0.0007           | ***     |
| DMSO vs. 50 $\mu$ M            | 0.0002           | ***     |
| DMSO vs. DTG                   | 0.1888           | ns      |
| DMSO vs. NVP                   | 0.0002           | ***     |
| <b>NL4-3 G140S-Q148H</b>       |                  |         |
| RM one-way ANOVA               | Adjusted P value | Summary |
| DMSO vs. 5 $\mu$ M             | 0.0030           | **      |
| DMSO vs. 10 $\mu$ M            | 0.0003           | ***     |
| DMSO vs. 50 $\mu$ M            | 0.0002           | ***     |
| DMSO vs. RAL                   | 0.4917           | ns      |
| DMSO vs. NVP                   | 0.0001           | ***     |
| <b>NL4-3 N155H-K211R-E212T</b> |                  |         |
| RM one-way ANOVA               | Adjusted P value | Summary |
| DMSO vs. 5 $\mu$ M             | 0.0010           | ***     |
| DMSO vs. 10 $\mu$ M            | 0.0002           | ***     |
| DMSO vs. 50 $\mu$ M            | 0.0001           | ***     |
| DMSO vs. RAL                   | 0.9893           | ns      |
| DMSO vs. NVP                   | 0.0001           | ***     |
| <b>NL4-3 I50V</b>              |                  |         |
| RM one-way ANOVA               | Adjusted P value | Summary |
| DMSO vs. 5 $\mu$ M             | 0.3743           | ns      |
| DMSO vs. 10 $\mu$ M            | 0.0133           | *       |

|                             |                  |         |
|-----------------------------|------------------|---------|
| DMSO vs. 50 $\mu$ M         | 0.0013           | **      |
| DMSO vs. DRV                | 0.9266           | ns      |
| DMSO vs. NVP                | 0.0016           | **      |
| <b>NL4-3 V32I-L33F-I47V</b> |                  |         |
| RM one-way ANOVA            | Adjusted P value | Summary |
| DMSO vs. 5 $\mu$ M          | 0.0003           | ***     |
| DMSO vs. 10 $\mu$ M         | <0.0001          | ****    |
| DMSO vs. 50 $\mu$ M         | 0.0001           | ***     |
| DMSO vs. DRV                | 0.3642           | ns      |
| DMSO vs. NVP                | 0.0001           | ***     |
| <b>NL4-3 V106M</b>          |                  |         |
| RM one-way ANOVA            | Adjusted P value | Summary |
| DMSO vs. 5 $\mu$ M          | 0.0414           | *       |
| DMSO vs. 10 $\mu$ M         | 0.0072           | **      |
| DMSO vs. 50 $\mu$ M         | 0.0008           | ***     |
| DMSO vs. NVP                | 0.9028           | ns      |
| DMSO vs. 3TC                | 0.0058           | **      |
| <b>NL4-3 M184V</b>          |                  |         |
| RM one-way ANOVA            | Adjusted P value | Summary |
| DMSO vs. 5 $\mu$ M          | 0.0011           | **      |
| DMSO vs. 10 $\mu$ M         | 0.0009           | ***     |
| DMSO vs. 50 $\mu$ M         | 0.0007           | ***     |
| DMSO vs. 3TC                | 0.1074           | ns      |
| DMSO vs. NVP                | 0.0009           | ***     |



| <b>Fig. EV2A</b> |               |         |
|------------------|---------------|---------|
| Wilcoxon test    | Exact p value | Summary |
| Input 2h         | 0.7500        | ns      |
| Cores 2h         | 0.2500        | ns      |
| Friedman test    | Exact p value | Summary |
| Input 16h        | 0.9444        | ns      |
| Cores 16h        | 0.0046        | **      |

| <b>Fig. EV2B</b>       |                  |         |
|------------------------|------------------|---------|
| Ordinary one-way ANOVA | Adjusted P Value | Summary |
| DMSO vs. H27           | 0.0028           | **      |
| DMSO vs. 31            | 0.9415           | ns      |
